# Supplementary material for: Pseudomonas fluorescens Showing Antifungal Activity against Macrophomina phaseolina, a Severe Pathogenic Fungus of Soybean, Produces Phenazine as the Main Active Metabolite
Source: MDPI journal article supplement (doi:10.3390/biom11111728), 2021-11-19
Supplement: s1 [file s1]

## Supporting Information List

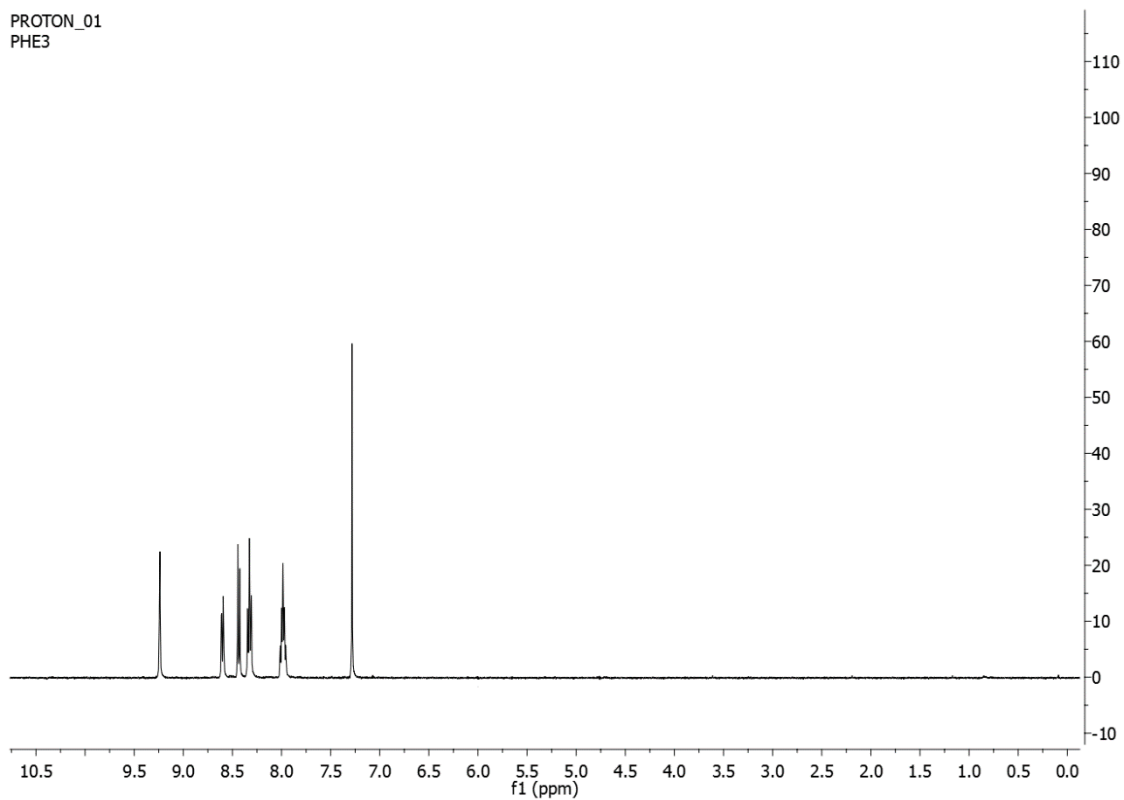

**Figure S1.** <sup>1</sup>H NMR spectrum of 2-nitrophenazine (**5**), recorded in CDCl<sub>3</sub> at 400 MHz.

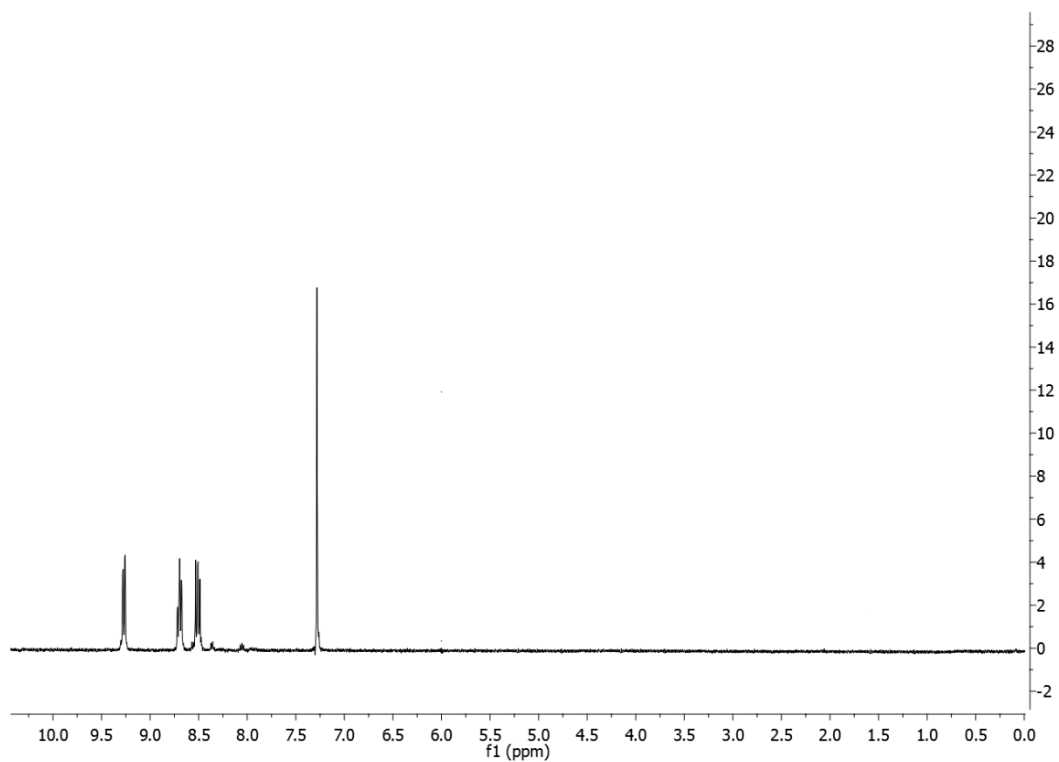

**Figure S2.** <sup>1</sup>H NMR spectrum of 1,3-dinitrophenazine (**6**), recorded in CDCl<sub>3</sub> at 400 MHz.

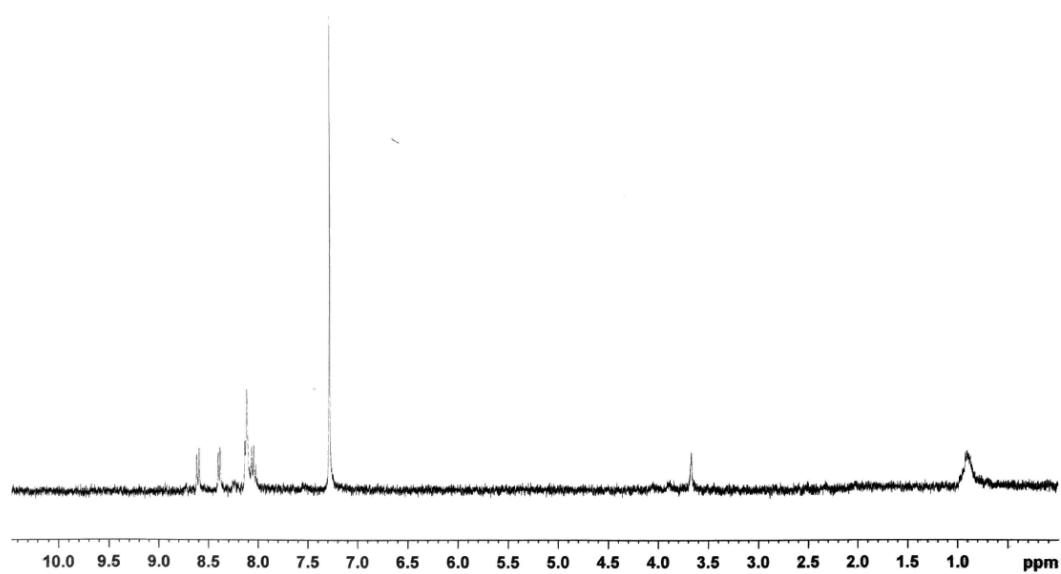

**Figure S3.**  $^1\text{H}$  NMR spectrum of 1,9-dinitrophenazine (**7**), recorded in  $\text{CDCl}_3$  at 400 MHz.

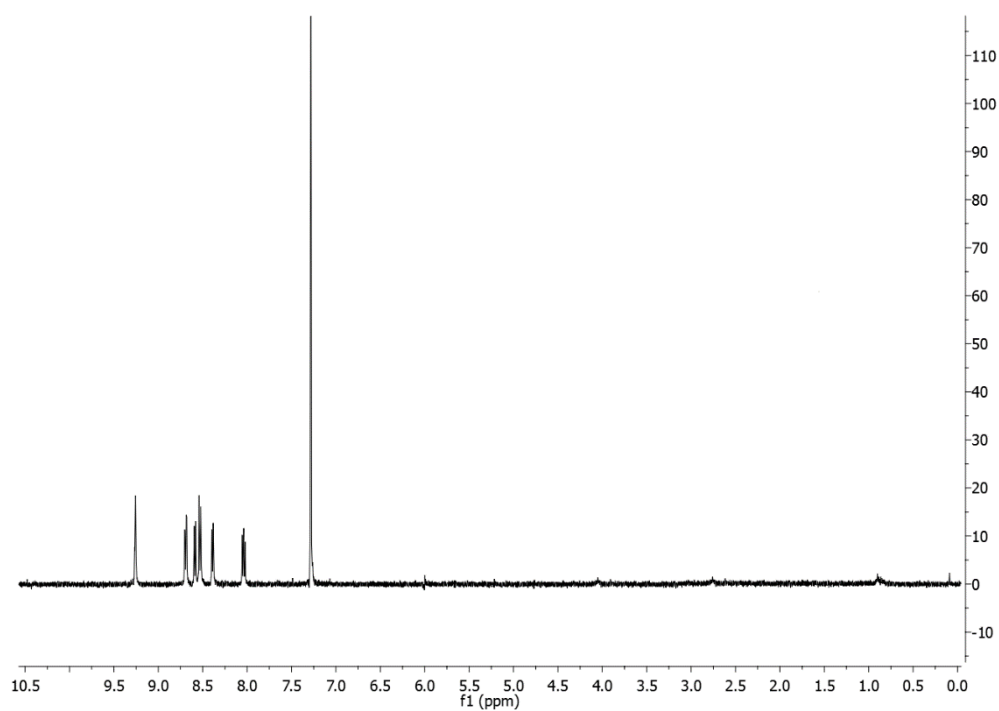

**Figure S4.**  $^1\text{H}$  NMR spectrum of 2,9-dinitrophenazine (**8**), recorded in  $\text{CDCl}_3$  at 400 MHz.
